# Supplementary material for: Genome Insight and Description of Previously Uncultured N2-Fixing Bacterium Rhizobium terricola sp. nov., Isolated from Forest Rhizospheric Soil by Using Modified Culture Method
Source: MDPI journal article supplement (doi:10.3390/d14090733), 2022-09-06
Supplement: s1 [file s1]

Archive with 1 entries (1 files):
- diversity-1845795-supplementary.pdf
