# Supplementary material for: Genome Insight and Description of Previously Uncultured N2-Fixing Bacterium Rhizobium terricola sp. nov., Isolated from Forest Rhizospheric Soil by Using Modified Culture Method
Source: MDPI journal article supplement (doi:10.3390/d14090733), 2022-09-06
Supplement: s1 [file s1 › diversity-1845795-supplementary.pdf]

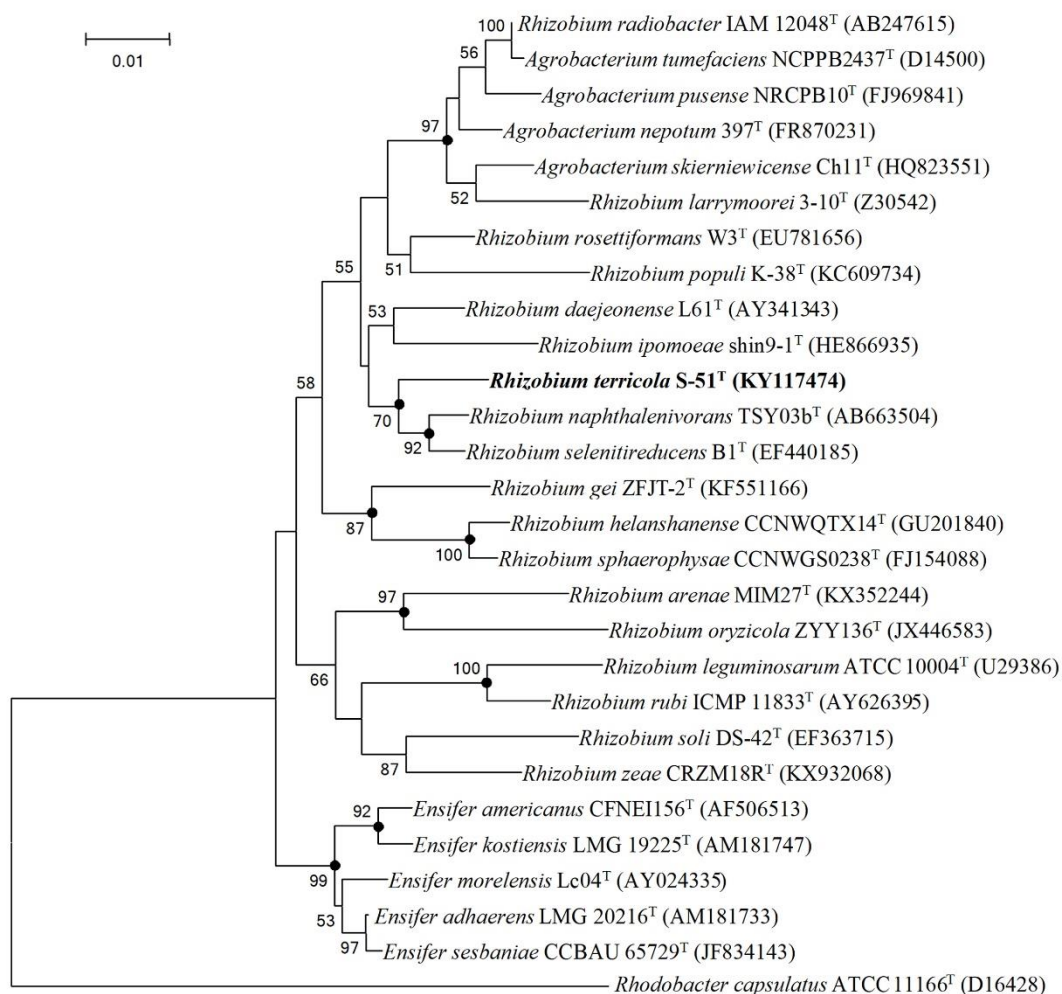

**Supplementary Figure S1.** Neighbor-joining tree based on 16S rRNA gene sequences showing the phylogenetic position of strain S-51<sup>T</sup> among closely related members of the family *Rhizobiaceae*. Filled circles indicate nodes recovered by all three treeing methods (neighbor-joining, maximum-likelihood and maximum-parsimony). The numbers at the nodes indicate the percentage of 1000 bootstrap replicates yielding this topology; only values >50% are shown. *Rhodobacter capsulatus* ATCC 11166<sup>T</sup> was used as an out-group. GenBank accession numbers are given in parentheses. Bar, 0.01 substitutions per nucleotide position.

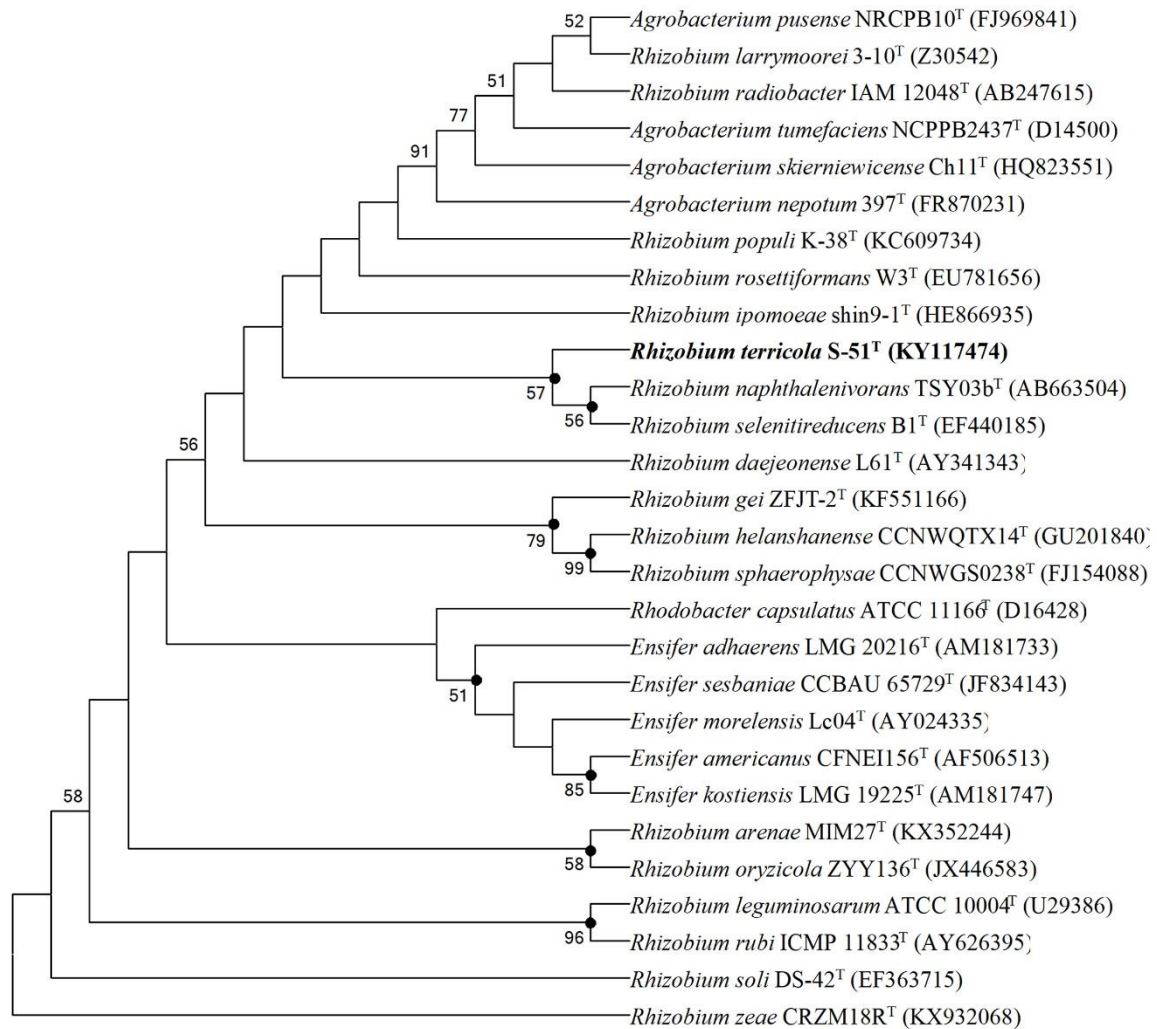

**Supplementary Figure S2.** Maximum-parsimony tree based on 16S rRNA gene sequences showing the phylogenetic position of strain S-51<sup>T</sup> among closely related members of the family *Rhizobiaceae*. Filled circles indicate nodes recovered by all three treeing methods (neighbor-joining, maximum-likelihood and maximum-parsimony). The numbers at the nodes indicate the percentage of 1000 bootstrap replicates yielding this topology; only values >50% are shown. GenBank accession numbers are given in parentheses.

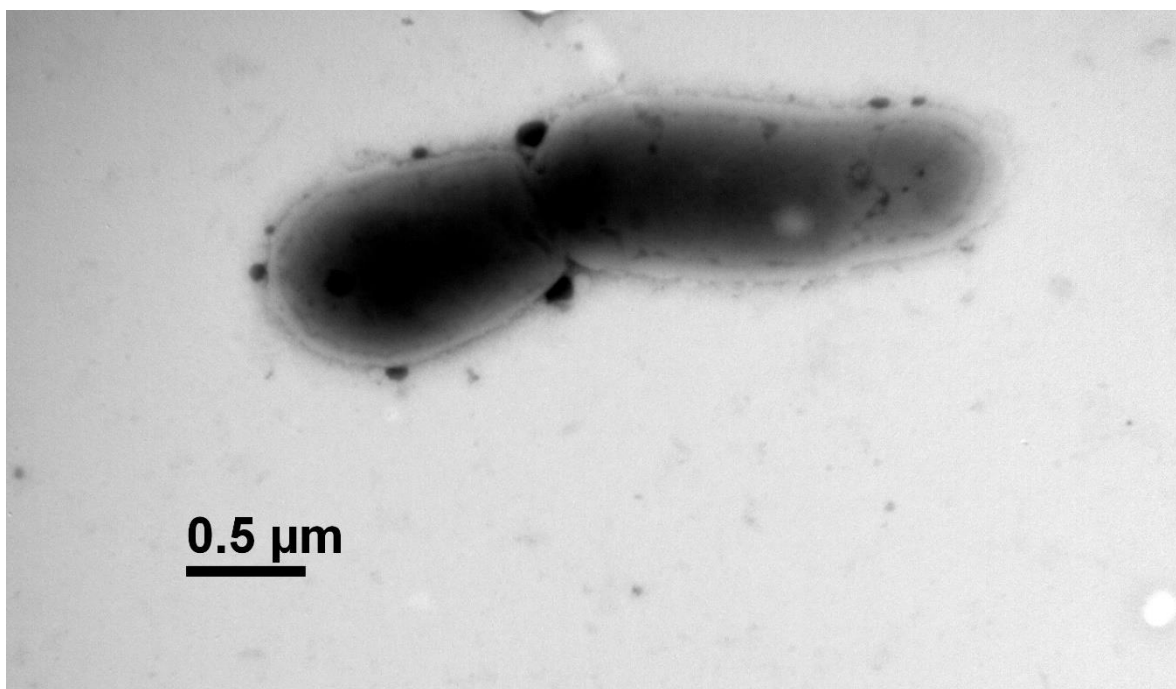

**Supplementary Figure S3.** Transmission electron microscopic image of strain S-51<sup>T</sup> grown on R2A agar at 40 °C for 1 week. Bar, 0.5 μm.

**Supplementary Table S1.** The distribution of biosynthetic gene clusters in strain S-51<sup>T</sup>. NRPS, non-ribosomal synthesized peptide; T1PKS, type I polyketide synthase. From and To indicate the number of nucleotide position in contigs.

| Cluster | Type             | From      | To        | Most similar known cluster |
|---------|------------------|-----------|-----------|----------------------------|
| 1       | Acyl_amino_acids | 47,221    | 107,982   | -                          |
| 2       | Hserlactone      | 898,450   | 919,091   | -                          |
| 3       | Terpene          | 1,408,750 | 1,429,604 | -                          |
| 4       | Hserlactone      | 138,179   | 158,802   | -                          |
| 5       | NRPS, T1PKS      | 58,736    | 111,321   | Entolysin (17%)            |
| 6       | Bacteriocin      | 23,326    | 34,180    | -                          |

**Supplementary Table S2.** N<sub>2</sub>-fixation regulatory proteins in S-51<sup>T</sup> genome.

| Accession         | Locus tag     | Protein product | Length | Protein name                                  |
|-------------------|---------------|-----------------|--------|-----------------------------------------------|
| JABBGK010000001.1 | HHL25_RS02720 | WP_169587021.1  | 396    | Nitrogen fixation protein FixF                |
| JABBGK010000001.1 | HHL25_RS04965 | WP_169587839.1  | 483    | Nitrogen regulation protein NR(I)             |
| JABBGK010000001.1 | HHL25_RS05235 | WP_015916113.1  | 112    | MULTISPECIES: P-II family nitrogen regulator  |
| JABBGK010000002.1 | HHL25_RS13300 | WP_169591489.1  | 154    | PTS IIA-like nitrogen regulatory protein PtsN |
| JABBGK010000003.1 | HHL25_RS15770 | WP_169593302.1  | 116    | P-II family nitrogen regulator                |
| JABBGK010000002.1 | HHL25_RS13290 | WP_169591482.1  | 522    | RNA polymerase factor sigma-54                |
